# Supplementary material
Source: PubMed Central journal article supplement (PMC6438697)
Supplement: NIHMS1015912-supplement-Table_S2.pdf [file NIHMS1015912-supplement-Table_S2.pdf]

**Table S2. Tandem repeat enrichment is associated with mutation mechanism. Related to Fig. 2.**

| Class     | Factor    | Variance explained |       | Test Statistic |                        |
|-----------|-----------|--------------------|-------|----------------|------------------------|
|           |           | Relative           | Total | Corr. Coef.    | p (F-test)             |
| VNTR      |           |                    | 43%   | 0.66           | $<2.2 \times 10^{-16}$ |
|           | MR        | 6%                 |       |                |                        |
|           | DSB       | 5.70%              |       |                |                        |
|           | MR x DNM  | 4.40%              |       |                |                        |
|           | MR X DSB  | 3.90%              |       |                |                        |
| STR       |           |                    | 25%   | 0.49           | $<2.2 \times 10^{-16}$ |
|           | MR        | 6.60%              |       |                |                        |
|           | DSB       | 5.40%              |       |                |                        |
|           | MR x DSB  | 2.50%              |       |                |                        |
|           | DSB x DNM | 1.60%              |       |                |                        |
| No Repeat |           |                    | 24%   | 0.49           | $<2.2 \times 10^{-16}$ |
|           | MR        | 4.20%              |       |                |                        |
|           | DSB       | 3.40%              |       |                |                        |
|           | DNM       | 3%                 |       |                |                        |
|           | MR x DSB  | 2.10%              |       |                |                        |
| All SVs   |           |                    | 36%   | 0.60           | $<2.2 \times 10^{-16}$ |
|           | MR        | 6.90%              |       |                |                        |
|           | DSB       | 5.20%              |       |                |                        |
|           | MR X DSB  | 3.50%              |       |                |                        |
|           | DNM       | 2.80%              |       |                |                        |

The genome-wide SV distribution is associated with several factors, and top correlations are found among male recombination (MR), double-strand breaks (DSB), de novo mutations (DNM), or a combination of these factors. For each SV class, the top four factors explaining observed variance in SV density ( $R^2$ ) are shown.
